# Supplementary material
Source: PubMed Central journal article supplement (PMC7530040)
Supplement: NIHMS1617575-supplement-12035_2020_2043_MOESM1_ESM.pdf [file NIHMS1617575-supplement-12035_2020_2043_MOESM1_ESM.pdf]

**Supplemental Table 1.** List of antibodies used for immunoprecipitation (IP); immunohistochemistry (IHC); western blot (WB)

**a**

| <b>Primary Antibody</b> | <b>Host</b> | <b>Concentration</b>    | <b>Manufacturer</b>                  | <b>Catalog No.</b> |
|-------------------------|-------------|-------------------------|--------------------------------------|--------------------|
| GR                      | Rabbit      | IP: 1:100               | Cell Signaling, Danvers, MA          | D6H2L              |
| GR                      | Mouse       | WB: 1:200<br>IHC: 1:200 | Santa Cruz Biotechnology, Dallas, TX | SC-393232          |
| Hsp90                   | Rabbit      | WB: 1:800<br>IHC: 1:100 | OriGene Antibodies, Rockville, MD    | TA500494           |
| Hsp70                   | Rabbit      | WB: 1:800<br>IHC: 1:100 | Origene Antibodies, Rockville, MD    | TA500772           |
| Hsp40                   | Mouse       | WB: 1:1000              | R&D Systems, Minneapolis, MN         | MAB4145            |
| Hop-1                   | Mouse       | WB: 1:500               | Cell Signaling, Danvers, MA          | 4464               |
| NeuN                    | Rabbit      | IHC: 1:500              | MilliporeSigma, Burlington, MA       | ABN78              |
| NeuN                    | Mouse       | IHC: 1:500              | MilliporeSigma, Burlington, MA       | MAB377             |
| GFAP                    | Mouse       | IHC: 1:100              | Sigma-Aldrich, St. Louis, MO         | G3893              |
| GFAP                    | Rabbit      | IHC: 1:100              | Sigma-Aldrich, St. Louis, MO         | SAB4501162         |

**b**

| <b>Secondary Antibody</b>                        | <b>Concentration</b> | <b>Manufacturer</b>                                  | <b>Catalog No.</b> |
|--------------------------------------------------|----------------------|------------------------------------------------------|--------------------|
| Biotinylated Goat $\alpha$ Rabbit                | IHC:1:100            | Vector Laboratories, Burlingame, CA                  | BA-1000            |
| Biotinylated Goat $\alpha$ Mouse                 | IHC: 1:100           | Vector Laboratories, Burlingame, CA                  | BA-9200            |
| Biotinylated Donkey $\alpha$ Sheep               | IHC: 1:100           | Millipore Sigma, Burlington, MA                      | AB324P             |
| FITC Donkey $\alpha$ Rabbit                      | IHC: 1:600           | Jackson Immunoresearch,<br>West Grove, PA            | 711-C95-152        |
| FITC Donkey $\alpha$ Mouse                       | IHC: 1:600           | Jackson Immunoresearch,<br>West Grove, PA            | 715-095-150        |
| Alexa 594 Donkey $\alpha$ Rabbit                 | IHC: 1:600           | Jackson Immunoresearch,<br>West Grove, PA            | 711-585-152        |
| Alexa 594 Donkey $\alpha$ Mouse                  | IHC: 1:600           | Jackson Immunoresearch,<br>West Grove, PA            | 715-585-150        |
| Polyclonal Goat Ant-Rabbit<br>Immunoglobulin HRP | WB: 1:1500           | Dako, part of ThermoFisher Scientific<br>Waltham, MA | P0448              |
| Polyclonal Goat Ant-Mouse<br>Immunoglobulin HRP  | WB: 1:2000           | Dako, part of ThermoFisher Scientific<br>Waltham, MA | P0447              |
